# Supplementary material for: Transposable Elements Are a Significant Contributor to Tandem Repeats in the Human Genome
Source: PubMed Central journal article supplement (PMC3389668; doi:10.1155/2012/947089), 2012-06-24
Supplement: 947089.f1.pdf [file 947089.f1.pdf]

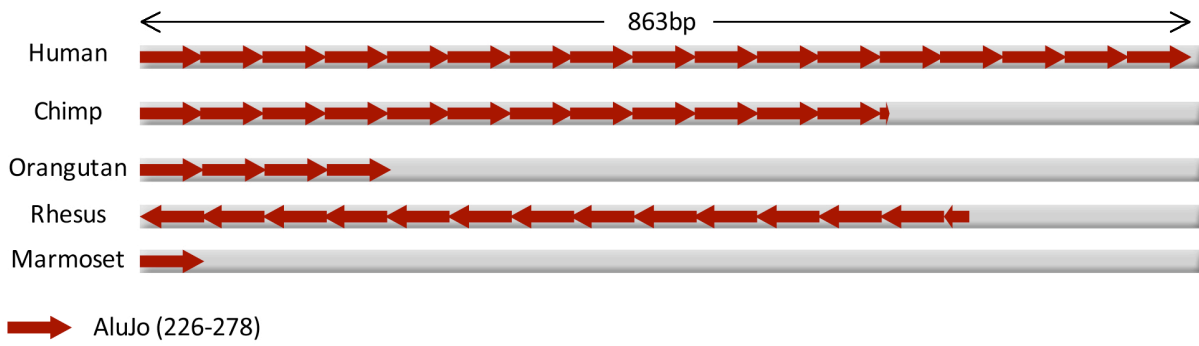

**Supplementary Figure 1: A schematic comparison for a 17-repeat TR array involving the 226-278bp region in a AluJo among difference species.** The human genomic region was compared with the corresponding region from chimp, orangutan, rhesus and marmoset.

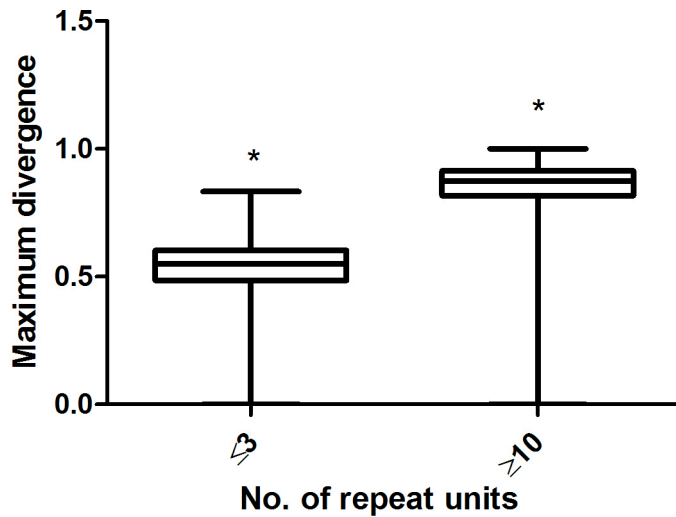

**Supplementary Figure 2: Box and Whiskers plot of maximum divergence among repeat units in TRs with  $\leq 3$  and  $\geq 10$  repeat units.** The mean maximal divergence among repeat units in TRs with  $\leq 3$  units is 0.5330 and is 0.8049 in TRs with  $\geq 10$  units based on all 5,902 non-LTR12 and non-L1PA TE-derived TRs. The asterisk denotes that they are significantly different ( $P < 0.0001$ ) in a two-tailed t-test.

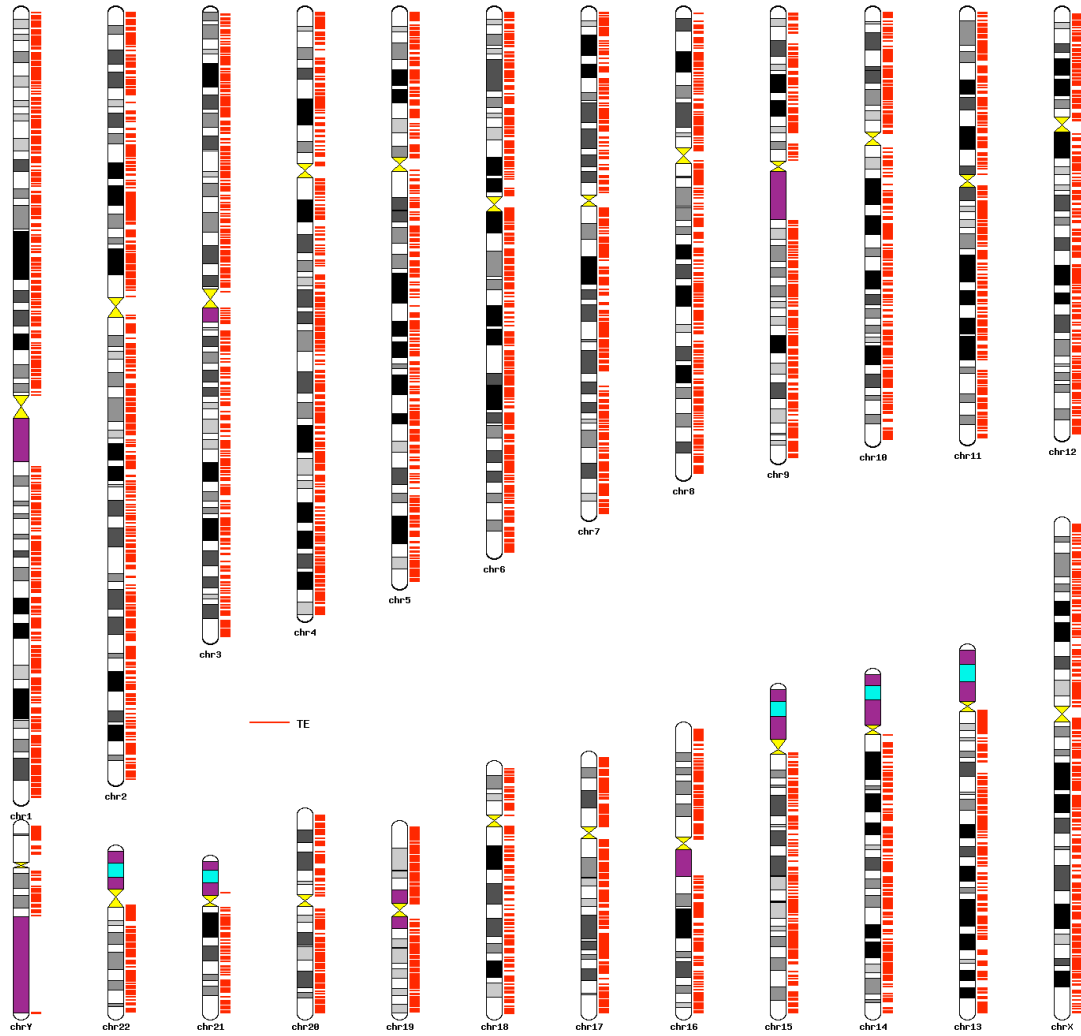

**Supplementary Figure 3: Genomic locations of all TE-derived TRs.** All individual TRs are plotted onto the human chromosome ideogram based on their genomic positions in the UCSC hg19 reference sequence. Chromosomal regions in color are heterochromatin regions which mostly lack sequence. Despite the ubiquitous but non-homogeneous distribution of TE-derived TRs in the genome, there seem to have no obvious hot spot.

**Supplementary Table 1: The number of mTRs at different repeat units for mTR clusters**

| Cluster No. | Unit size | No. of repeat unit of each TR in the cluster | No. of different loci the TR appear in | TE subfamily  |
|-------------|-----------|----------------------------------------------|----------------------------------------|---------------|
| 6           | 109       | 2                                            | 36                                     | AluS          |
|             |           | 3                                            | 6                                      |               |
|             |           | 4                                            | 1                                      |               |
|             |           | 17                                           | 1                                      |               |
| 7           | 125       | 2                                            | 36                                     | AluS          |
|             |           | 3                                            | 5                                      |               |
|             |           | 5                                            | 3                                      |               |
| 20          | 22        | 2                                            | 22                                     | L1P3/L1PR     |
|             |           | 3                                            | 1                                      |               |
| 14          | 268       | 2                                            | 25                                     | AluY          |
|             |           | 3                                            | 3                                      |               |
| 22          | 32        | 2                                            | 13                                     | AluS          |
|             |           | 3                                            | 1                                      |               |
|             |           | 7                                            | 1                                      |               |
| 18          | 161       | 2                                            | 21                                     | AluY          |
|             |           | 3                                            | 1                                      |               |
|             |           | 14                                           | 2                                      |               |
| 24          | 54        | 2                                            | 11                                     | THE1C-int     |
|             |           | 3                                            | 1                                      |               |
| 32          | 68        | 2                                            | 8                                      | HERVH-int     |
|             |           | 3                                            | 1                                      |               |
| 71          | 352       | 3                                            | 2                                      | AluSx         |
|             |           | 4                                            | 2                                      |               |
| 55          | 42        | 2                                            | 4                                      | HERVH-int     |
|             |           | 3                                            | 1                                      |               |
|             |           | 6                                            | 1                                      |               |
| 84          | 49        | 4                                            | 3                                      | MER57A-int    |
|             |           | 17                                           | 1                                      |               |
| 259         | 42        | 2                                            | 1                                      | HERVH-int     |
|             |           | 4                                            | 1                                      |               |
| 89          | 28        | 2                                            | 3                                      | LTR10F        |
|             |           | 8                                            | 1                                      |               |
| 31          | 113       | 2                                            | 8                                      | Harlequin-int |
|             |           | 3                                            | 1                                      |               |
| 208         | 71        | 2                                            | 1                                      | AluSx         |
|             |           | 3                                            | 1                                      |               |
| 62          | 42        | 2                                            | 3                                      | HERVH-int     |
|             |           | 3                                            | 1                                      |               |
|             |           | 4                                            | 1                                      |               |

|     |     |    |    |           |
|-----|-----|----|----|-----------|
| 67  | 31  | 2  | 4  | AluY/AluS |
|     |     | 3  | 1  |           |
| 198 | 78  | 2  | 1  | AluS      |
|     |     | 3  | 1  |           |
| 139 | 664 | 2  | 1  | HERVE-int |
|     |     | 3  | 1  |           |
| 129 | 24  | 2  | 2  | HERVH-int |
|     |     | 3  | 1  |           |
| 236 | 45  | 2  | 1  | AluSx     |
|     |     | 3  | 1  |           |
| 145 | 255 | 2  | 1  | MSR1      |
|     |     | 4  | 1  |           |
| 178 | 102 | 2  | 1  | AluS      |
|     |     | 3  | 1  |           |
| 124 | 28  | 2  | 2  | LTR10F    |
|     |     | 12 | 1  |           |
| 47  | 114 | 2  | 4  | HERVH-int |
|     |     | 3  | 1  |           |
|     |     | 5  | 1  |           |
| 43  | 25  | 5  | 1  | L1M5      |
|     |     | 6  | 1  |           |
| 244 | 44  | 2  | 1  | AluSq     |
|     |     | 3  | 1  |           |
| 74  | 221 | 2  | 3  | AluY      |
|     |     | 3  | 1  |           |
| 113 | 39  | 2  | 1  | AluY/AluS |
|     |     | 3  | 1  |           |
| 39  | 64  | 2  | 1  | HERVH-int |
|     |     | 4  | 2  |           |
|     |     | 5  | 1  |           |
|     |     | 6  | 1  |           |
|     |     | 7  | 2  |           |
| 120 | 32  | 2  | 2  | AluS      |
|     |     | 3  | 1  |           |
| 239 | 49  | 3  | 1  | L2c       |
|     |     | 5  | 1  |           |
| 301 | 32  | 13 | 1  | LTR7B     |
|     |     | 14 | 1  |           |
| 27  | 32  | 2  | 10 | AluS      |
|     |     | 3  | 1  |           |
| 60  | 63  | 2  | 4  | HERVH-int |
|     |     | 3  | 1  |           |
| 247 | 46  | 2  | 1  | AluSx     |
|     |     | 4  | 1  |           |
| 82  | 49  | 2  | 3  | AluS      |
|     |     | 3  | 1  |           |
| 212 | 70  | 2  | 1  | AluJr     |
|     |     | 3  | 1  |           |
| 33  | 61  | 2  | 5  | HERVH-int |

|     |    |    |   |           |
|-----|----|----|---|-----------|
|     |    | 3  | 4 |           |
| 63  | 37 | 2  | 3 | HERVH-int |
|     |    | 3  | 1 |           |
|     |    | 6  | 1 |           |
| 80  | 93 | 2  | 3 | HERVH-int |
|     |    | 3  | 1 |           |
| 54  | 42 | 2  | 2 | HERVH-int |
|     |    | 3  | 3 |           |
|     |    | 8  | 1 |           |
| 40  | 60 | 2  | 5 | HERVH-int |
|     |    | 3  | 1 |           |
|     |    | 9  | 1 |           |
| 278 | 36 | 6  | 1 | MSR1      |
|     |    | 29 | 1 |           |
| 34  | 30 | 2  | 7 | AluS      |
|     |    | 3  | 2 |           |

**Supplementary Table 2: The distribution of direct repeat length for TE-derived TRs with identifiable direct repeats**

| Direct repeat length (bp) | Number of occurrence |
|---------------------------|----------------------|
| <7                        | 0                    |
| 7                         | 145                  |
| 8                         | 47                   |
| 9                         | 21                   |
| 10                        | 11                   |
| 11                        | 12                   |
| 12                        | 15                   |
| 13                        | 12                   |
| 14                        | 9                    |
| 15-20                     | 28                   |
